# Supplementary material
Source: Springer Nature journal article supplement (https://www.springermedizin.de/resource/supplementary/13231_2013_94_MOESM4_ESM.pdf/9676534)

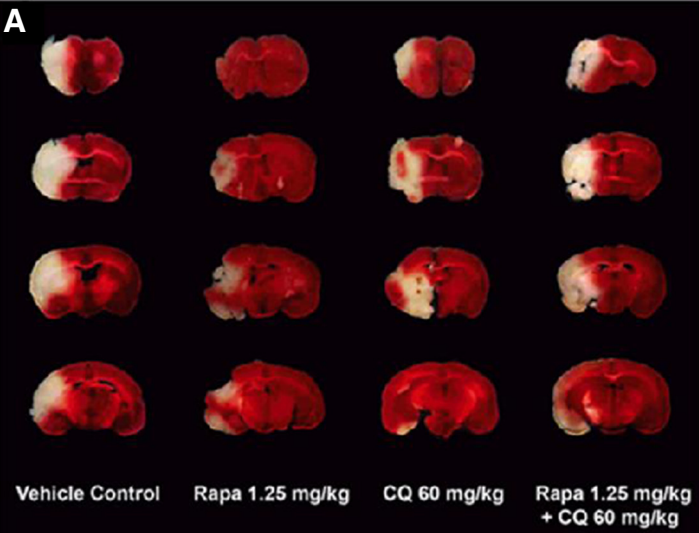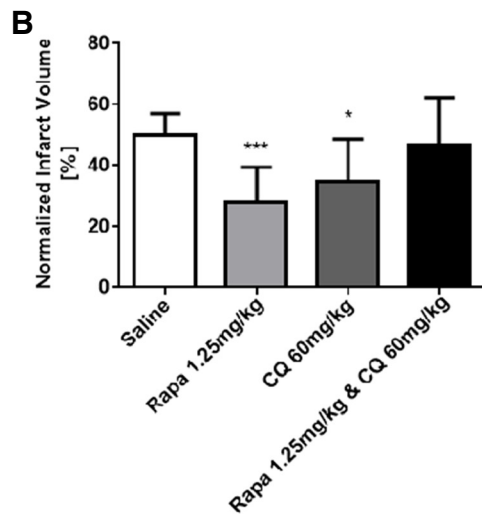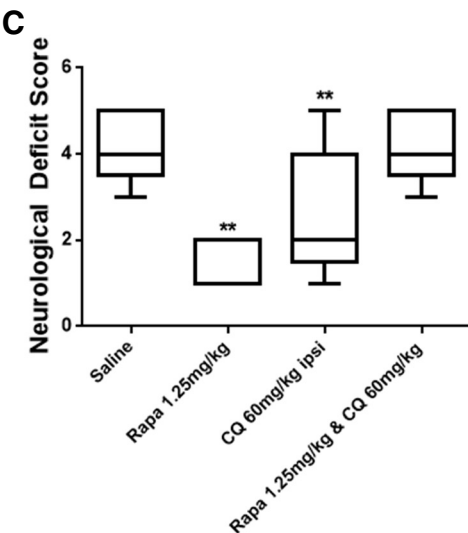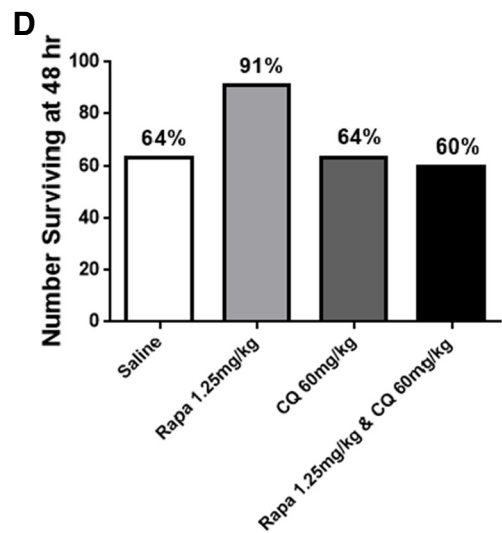

Supplement: MOESM4 [file 9676534]
